# Supplementary material for: Salvage External Beam Radiotherapy after Incomplete Transarterial Chemoembolization for Hepatocellular Carcinoma: A Meta-Analysis and Systematic Review
Source: MDPI journal article supplement (doi:10.3390/medicina57101000), 2021-09-22
Supplement: s1 [file s1]

Supplement Table S1. Scoring sheet according to Newcastle-Ottawa Scale

|        | Selection                                      |                                           |                              |                                                             | Comparability                                                         | Outcome                  |                                                       |                                        | Overall score<br>(9 to be full ) |
|--------|------------------------------------------------|-------------------------------------------|------------------------------|-------------------------------------------------------------|-----------------------------------------------------------------------|--------------------------|-------------------------------------------------------|----------------------------------------|----------------------------------|
|        | 1                                              | 2                                         | 3                            | 4                                                           | 1                                                                     | 1                        | 2                                                     | 3                                      |                                  |
|        | Representativeness<br>of the exposed<br>cohort | Selection of the<br>non exposed<br>cohort | Ascertainment<br>of exposure | Outcome of interest<br>was not present at<br>start of study | Comparability of cohorts<br>on the basis of the design<br>or analysis | Assessment<br>of outcome | Was follow-up long<br>enough for<br>outcomes to occur | Adequacy of<br>follow up of<br>cohorts |                                  |
| Oh     | 1                                              | 1                                         | 1                            | 1                                                           | 0                                                                     | 1                        | 1                                                     | 1                                      | 7                                |
| Kim    | 1                                              | 1                                         | 1                            | 1                                                           | 0                                                                     | 1                        | -1                                                    | 1                                      | 6                                |
| Choi   | 1                                              | 1                                         | 1                            | 1                                                           | 0                                                                     | 1                        | 1                                                     | 1                                      | 7                                |
| Kang   | 1                                              | 1                                         | 1                            | 1                                                           | 0                                                                     | 1                        | 1                                                     | 1                                      | 7                                |
| Shim   | 1                                              | 1                                         | 1                            | 1                                                           | 0                                                                     | 1                        | 1                                                     | 1                                      | 7                                |
| Zhong  | 1                                              | 1                                         | 1                            | 1                                                           | 0                                                                     | 1                        | 1                                                     | 1                                      | 7                                |
| Chiang | 1                                              | 1                                         | 1                            | 1                                                           | 0                                                                     | 1                        | 1                                                     | 1                                      | 7                                |
| Jacob  | 1                                              | 1                                         | 1                            | 1                                                           | 0                                                                     | 1                        | 1                                                     | 1                                      | 7                                |
| Kibe   | 1                                              | 1                                         | 1                            | 1                                                           | 0                                                                     | 1                        | 1                                                     | 1                                      | 7                                |
| Yao    | 1                                              | 1                                         | 1                            | 1                                                           | 0                                                                     | 1                        | 1                                                     | 1                                      | 7                                |
| Byun   | 1                                              | 1                                         | 1                            | 1                                                           | 0                                                                     | 1                        | 1                                                     | 1                                      | 7                                |
| Park   | 1                                              | 1                                         | 1                            | 1                                                           | 0                                                                     | 1                        | -1                                                    | 1                                      | 6                                |
